# Supplementary material for: From Tsunami Risk Assessment to Disaster Risk Reduction. The case of Oman
Source: Copernicus journal article supplement (doi:10.5194/nhess-2017-448), 2018-01-09
Supplement: Supplementary file [file nhess-2017-448-AC2-supplement.pdf]

# 1 From Tsunami Risk Assessment to Disaster Risk Reduction. The case 2 of Oman

3 Ignacio Aguirre Ayerbe<sup>1</sup>, Jara Martínez Sánchez<sup>1</sup>, Íñigo Aniel-Quiroga<sup>1</sup>, Pino González-Riancho<sup>2</sup>, María  
4 Merino<sup>1</sup>, Sultan Al-Yahyai<sup>3</sup>, Mauricio González<sup>1</sup>, Raúl Medina<sup>1</sup>

5 <sup>1</sup>Environmental Hydraulics Institute “IHCantabria”, University of Cantabria, Santander, 39011, Spain

6 <sup>2</sup>GFA Consulting Group, Hamburg, 22359, Germany

7 <sup>3</sup>Directorate General of Meteorology and Air Navigation. Public Authority for Civil Aviation, Muscat, 111, Oman

8 *Correspondence to:* I. Aguirre Ayerbe (ignacio.aguirre@unican.es)

9 **Abstract.** Oman is located in an area of high seismicity, facing the Makran Subduction Zone, which is the major source of  
10 earthquakes in the eastern border of the Arabian plate. These earthquakes, as evidenced by several past events, may trigger a  
11 tsunami event. The aim of this work is to minimize the consequences that tsunami events may cause in coastal communities  
12 by integrating tsunami risk assessment and risk reduction measures as part of the risk-management preparedness strategy. An  
13 integrated risk assessment approach and the analysis of site-specific conditions permitted to propose target-oriented risk  
14 reduction measures. The process included a participatory approach, involving a panel of local stakeholders and international  
15 experts. One of the main concerns of this work was to obtain a useful outcome for the actual improvement of tsunami risk  
16 management in Oman. This goal was achieved through the development of comprehensive and functional management tools  
17 such as the Tsunami Hazard, Vulnerability and Risk Atlas and the Risk Reduction Measures Handbook, which will help to  
18 design and plan a roadmap towards risk reduction.

19 The integrated tsunami risk assessment performed showed that the northern area of Oman would be the most affected,  
20 considering both the hazard and vulnerability components. This area also concentrates nearly 50% of the hot spots identified  
21 throughout the country, 70% of them are located in areas with a very-high risk class, in which risk reduction measures were  
22 selected and prioritized.

## 23 1 Introduction

24 Tsunamis are low-frequency natural events but have a great destructive power when striking coasts around the world, involving  
25 loss of life and extensive damage to infrastructures and coastal communities worldwide. Between 1996 and 2015, estimated  
26 tsunami disaster losses reached 250,000 lives, more than 3,500,000 affected people and more than 220,000 million of USD  
27 (International Disaster Database, EM-DAT; UNISDR/CRED, 2016).

28 Oman is located in an area of high seismicity, facing the Makran Subduction Zone (MSZ), which is the major source of  
29 earthquakes in the eastern border of the Arabian plate (Al-Shaqsi, 2012). These earthquakes may trigger a tsunami event, as  
30 evidenced at least three times in the past (Heidarzadeh et al., 2008a,; Jordan, 2008). The high potential for tsunami generation  
31 of MSZ makes it one of the most tsunamigenic areas of the Indian Ocean. The most recent tsunami event of seismic origin  
32 was the 1945 Makran tsunami, which caused more than 4,000 fatalities and property losses in Iran, Pakistan, Oman and the  
33 United Arab Emirates (Heck, 1947; Heidarzadeh et al., 2008, 2009, 2011, 2014a, 2014b; Mokhtari, 2011, Latcharote et al.,  
34 2017). Similar episodes may occur again in this area.

35 In addition to the tsunami threat on the coast of Oman, the rapid development and industrialization of this area explains the  
36 need to develop specific studies on tsunami vulnerability and risk, especially in the northern low-lying coastal plain, which is  
37 the most densely populated and most exposed to the MSZ.

38 Suitable tsunami vulnerability and risk assessments are essential for the identification of the exposed areas and the most  
39 vulnerable communities and elements. They allow identifying appropriate site-specific risk management strategies and

40 measures, thus enabling to mainstream disaster risk reduction (DRR) into development policies, plans and programs at all  
41 levels including prevention, mitigation, preparedness, and vulnerability reduction, considering its root causes.  
42 Most methods for risk assessment are quantitative or semi quantitative (usually indicator-based). Quantitative risk assessments  
43 are generally better related to the analysis of specific impacts, which require large scales and high resolution for all the  
44 components **contributing** the risk. Results are usually expressed in terms of potential losses both economic (derived from  
45 building damage or even infrastructure damage) and human (derived from mortality estimations). **There are several works**  
46 **following this approach, among others Tinti et al. (2011) and Valencia et al. (2011) within the frame of the European project**  
47 **SCHEMA<sup>1</sup>, Leone et al. (2011), Suppasri (2011), Mas et al. (2012), Suppasri et al. (2013), Sohi and Nakamura (2017), and**  
48 **Suppasri et al. (2018), with a main focus on infrastructure and building damage. Sato et al. (2003), Sugimoto et al. (2003),**  
49 **Koshimura et al. (2006), Jonkman et al. (2008) and Løvholt et al., 2014 focused on human damage and casualties whereas**  
50 **Berryman et al. (2005) and Harbitz et al. (2016) dealt with both aspects.**

51 Although not as common, quantitative risk assessments are sometimes applied at global scale such as the case of the GRM -  
52 Global Risk Model (last version in GAR, 2017), which addresses a probabilistic risk model at a world scale to assess economic  
53 losses based on buildings damage (Cardona et al., 2015).

54 However, when the scope requires a holistic and integrated approach in which several dimensions, criteria and variables with  
55 different magnitudes and ranges of values **have to be taken** into consideration, such as the case of the present work, it is  
56 necessary to apply an indicator-based method. Some works following this approach may be found in ESPON (2006), Dall'Osso  
57 et al. (2009a, 2009b), Taubenböck et al. (2008), Jelínek (2009, 2012), Birkmann et al. (2010, 2013), Strunz et al. (2011),  
58 Aguirre-Ayerbe (2011), Wegscheider, et al. (2011), González-Riancho et al. (2014), the European TRANSFER<sup>2</sup> project, the  
59 Coasts at Risk report (2014), the World Risk Report (last version: Garschagen et al., 2016) and the INFORM Global Risk  
60 Index (INFORM, 2017).

61 Nevertheless, very few of **the previous works** tackle with the direct link between integrated tsunami risk results and risk  
62 reduction measures (RRM). González-Riancho et al., (2014) propose a translation of risk results into disaster risk management  
63 options and Suppasri et al. (2017) describe some recommendations based on the lessons learned in recent tsunamis.

64 Therefore, it has been identified that there is not a clear applicability of science-based tsunami hazard and vulnerability tools  
65 to improve actual DRR efforts, highlighting a general disconnection between technical and scientific studies and risk  
66 management.

67 This work attempts to be complementary to preceding efforts and to fill the gap found in previous studies. The developed  
68 methodology is based on the direct relationship found between risk components (hazard, exposure and vulnerability) and  
69 specific DRR measures and integrates tsunami risk assessment and site-specific characteristics to select a suitable set of  
70 tsunami countermeasures. The ultimate goal is the application of the method and the generation of useful management tools  
71 to minimize the consequences that a potential tsunami could have on the coast of Oman.

## 72 **2 Methodology**

73 The methodology comprises two main phases: (i) the integrated tsunami risk assessment and (ii) the identification, selection  
74 and prioritization of appropriate DRR measures. These two different but complementary tasks will guide the entire  
75 methodology applied in this work.

---

<sup>1</sup> SCHEMA Project: Scenarios for Hazard-induced Emergencies Management. European 6th Framework Programme Project no. 030963, August 2007 - October 2010.

<sup>2</sup> TRANSFER project: Tsunami Risk and Strategies for the European Region. European 6<sup>th</sup> Framework Programme no. 37058, October 2006-September 2009.

76 As regards the conceptual framework, the methodology applied is fundamentally adapted from the definitions of UNISDR  
 77 (2004, 2009), ISO/IEC Guide 73 (2009), UNESCO (2009b) and UN (2016). Accordingly, the sequence of the work is  
 78 summarized schematically in Figure 1. Within the disaster risk assessment phase and prior to any risk study, it is necessary to  
 79 define the consequence to be analysed and the type of result pursued (for example, the estimation of buildings damages **or** the  
 80 community's affection from a holistic perspective, as the case presented in this article). The establishment of this main goal  
 81 determines the specific method, the dimensions to include in the study and the spatial and temporal scales (point 1 of Figure  
 82 1).

83

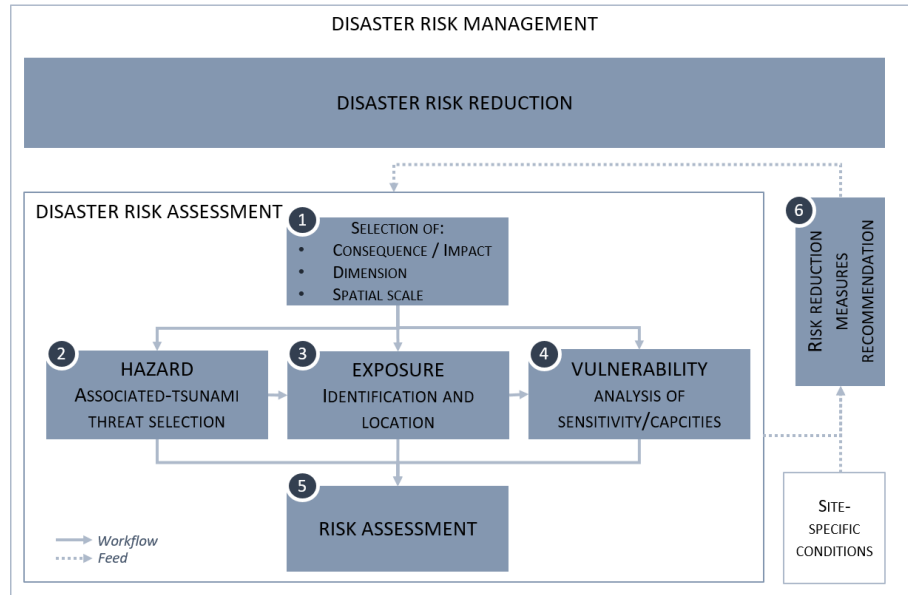

84

85 **Figure 1. Schematic workflow**

86 Next, the assessment of the hazard, explained in detail in section 2.1 Hazard Assessment, requires the selection of the variable  
 87 associated to the event (e.g. **flow depth**) mainly determined by the general goal defined in the first step. The hazard evaluation  
 88 drives to the analysis of the individuals and elements exposed (e.g. people, buildings and infrastructures located in a flooded  
 89 populated area) together with its vulnerability (e.g. sensitive age groups). The risk assessment is performed by the combination  
 90 of the vulnerability assessment -of what is exposed- and the hazard intensity (points 3, 4 and 5 of Figure 1, explained in detail  
 91 in sections 2.2 Vulnerability assessment and 2.3 Risk Assessment). Both, exposure, vulnerability and the integration of all risk  
 92 components, circumscribed to a given spatial, cultural and socioeconomic context, are necessary for the preliminary selection  
 93 of risk reduction strategies and measures. These countermeasures are essential to prevent new and reduce existing risk, as  
 94 stated by UN (2016), contributing to the strengthening of resilience and reduction of disaster losses (point 6 in Figure 1.  
 95 Schematic workflow, detailed in section 2.4 Risk reduction measures).

96 The determination of the efficiency of each proposed countermeasure is essential for the success of the risk reduction planning.  
 97 When an appropriate countermeasure is selected, the overall risk assessment must be conducted again to understand how and  
 98 to what extent it will actually reduce the risk.

99 DRR measures are framed in the disaster risk management cycle proposed below, which brings together four main strategies  
 100 for risk reduction (Figure 2): (i) prevention and (ii) preparedness strategies in the pre-event stage and (iii) emergency/response  
 101 and (iv) recovery in the post-event phase. Each of the strategies includes several actions that may be overlapped on time and  
 102 that may even belong to more than one strategy. At the centre of the figure, research is presented as an essential element to  
 103 improve disaster management enriching the process through the integration of various disciplines and studies. This particular  
 104 study focuses on the strategies related to the pre-event phase: the prevention and the preparedness, which are explained in  
 105 section 2.4 Risk reduction measures.

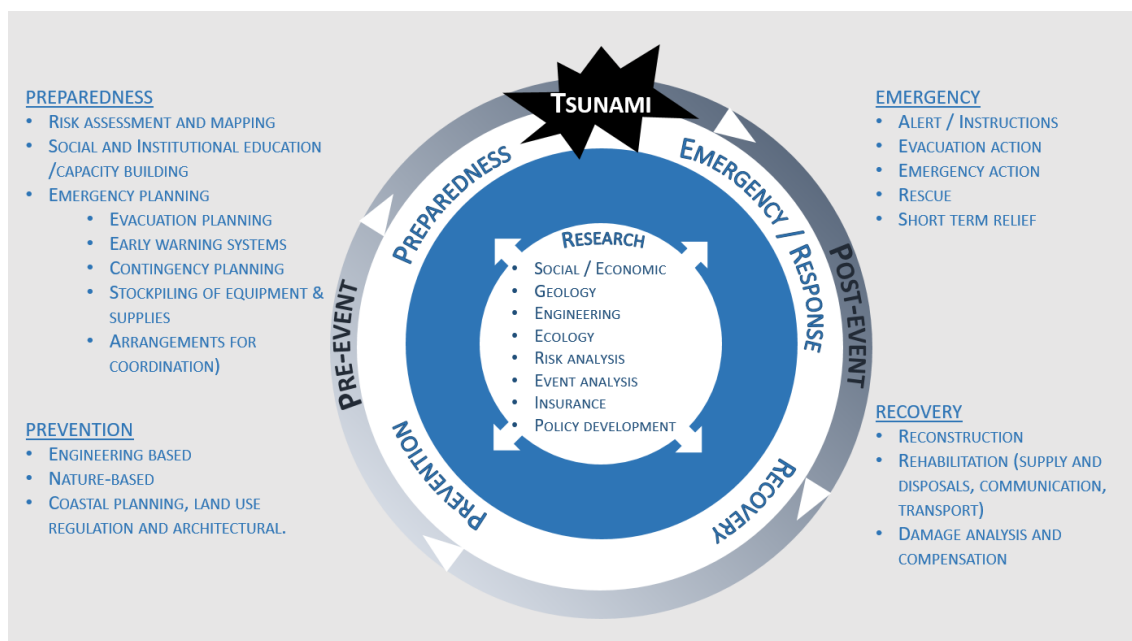

106

107 **Figure 2. Disaster risk management cycle.**

108 Risk and vulnerability assessments are performed both for a specific place and at a specific time. For this reason, both the  
 109 analysis and the proposal of measures for risk reduction must be updated periodically, considering the changes that may occur  
 110 over time and their influence on the results, such as a significant variation in population, land-use changes, new constructions  
 111 or new lessons learnt.

112 The involvement of key local stakeholders and decision-makers in coastal risk management is essential throughout the entire  
 113 process, both to include their knowledge and expertise and to enhance the usefulness of the results of the project throughout  
 114 their encouragement. Thus, a stakeholder panel composed of local and international experts on coastal risks and risk  
 115 management supported the entire process, driven to actively participate and collaborate to achieve the goal of DRR. Their  
 116 main contribution focused on the validation of the methodological approach, the identification of hot spots and the analysis of  
 117 the technical, institutional and financial capacities of the country for implementing each one of the countermeasures. In the  
 118 last stage of the study, they prioritized each measure according to their knowledge and expertise.

119 **2.1 Hazard Assessment**

120 The hazard analysis allows determining the areas that would be affected due to the potential tsunamis that may strike the study  
 121 area. The analysis is carried out considering the worst possible tsunami scenarios based on the seism-tectonic characterization  
 122 of the area, so that the maximum impact that a tsunami would cause is calculated. Similar approaches may be found in Jelínek  
 123 et al. (2009, 2012), Álvarez-Gómez et al. (2013) and Wijetunge (2014) among others. The deterministic tsunami hazard  
 124 analysis allows identifying, locating and analysing the elements at risk in a conservative approach. It is worth considering this  
 125 method when dealing with intensive risks, i.e. derived from low frequency but high severity hazards, such as tsunamis, where  
 126 the catastrophic consequences of the impact are complex and difficult to estimate.

127 **In this study, only potential earthquake sources were considered as the tsunami generation mechanism.** A seism-tectonic  
 128 analysis was performed to identify and characterise the major seismic structures with capacity to generate a tsunami affecting  
 129 the coast of Oman (see Aniel-Quiroga et al., 2015). The study area was divided in three tectonically homogeneous zones  
 130 including eleven main structures. The geometrical characterization of the fault planes (from the tectonics and the focal  
 131 mechanisms analysis) allowed identifying 3181 focal mechanisms with a magnitude varying from Mw 6.5 to Mw 9.25.

132 Once these scenarios are established, the analysis includes the characterization of the quake (fault location, **magnitude**, length  
 133 and width of the fault, fault dislocation angles, epicentre location and focal depth of the epicentre) and the sea level. The  
 134 numerical modelling applied to conduct the simulations is COMCOT (Wang, 2009), **which solves shallow water equations**

135 using Okada model (Okada, 1985) model to generate the initial deformation of the sea surface. This model uses moving  
 136 boundary technique for land flooding. Based on the bathymetry, the propagation of each potential tsunami is modelled from  
 137 the source to the coast. Finally, according to the topography, the coastal area is flooded, with a final resolution (grid size) of  
 138 45 m onshore.

139 The approach is described in detail in Aniel-Quiroga et al. (2015) and is based on the works of Álvarez-Gómez et al. (2014)  
 140 and Gutiérrez et al. (2014).

141 Figure 3 shows the distribution of the major seismic structures and the number of events propagated for each of them. The  
 142 seism-tectonic study was particularly focused in the Makran subduction zone, since it is possibly the most active area in the  
 143 western Indian Ocean and located very near the north coast of Oman.

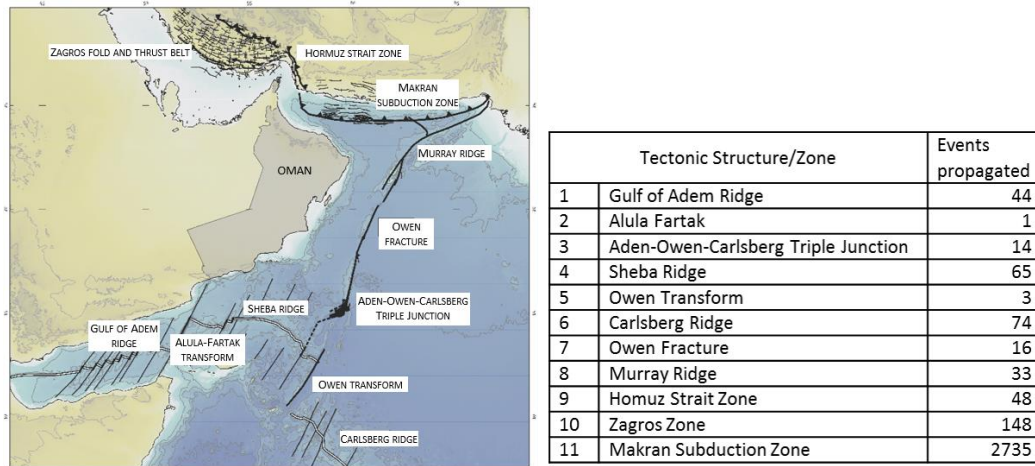

144  
 145 **Figure 3. Main seismic areas surrounding the study area and number of events propagated for each area**

146 On one side, the complete set of the 3181 scenarios were included in a tsunami-scenarios database, which is the basis of the  
 147 current early warning system in the country. On the other, seven scenarios were selected to perform the deterministic hazard  
 148 assessment, including the historical event of 1945, which took place in the Makran subduction zone (Heidarzadeh et al., 2008).  
 149 Hazard variables are calculated at each time step of every single simulation and then the maximum values are selected. These  
 150 scenarios were aggregated into a map that shows at each point of the study area the worst possible situation. This enveloping  
 151 map is the base for the risk assessment and includes the variables of flow depth (vertical distance between the water surface  
 152 and the ground, also called inundation depth by some authors, e.g., Aniel-Quiroga et al., 2015), water velocity, and a proxy  
 153 for the drag force, the depth-velocity product (drag level).

154 Hazard variables were finally classified into five levels of intensity to be subsequently combined with vulnerability, as  
 155 described in section 2.3 Risk Assessment Risk Assessment. Tsunami drag level classification is based on previous works  
 156 carried out by Xia et al. (2014), Jonkman et al. (2008), Karvonen et al. (2000), Abt et al. (1989), which establish different  
 157 thresholds related to the people stability. As for the flow depth variable, the classification is based on the work developed in  
 158 the SCHEMA project (Tinti et al., 2011) to establish building damage levels, based on empirical damage functions considering  
 159 building materials and water depth.

## 160 2.2 Vulnerability assessment

161 The method applied to assess the vulnerability relies on an indicator-based approach. The process include three main stages:  
 162 (a) the definition of criteria for selecting the dimensions and variables to be analysed for the exposed elements, (b)  
 163 establishment, calculation and classification of indicators and (c) the construction of vulnerability indexes and its classification.  
 164 These steps are explained in the following paragraphs.

165 Two different dimensions are selected: human and infrastructures, with the aim of developing an analysis with a human-centred  
 166 perspective. On one side, the human dimension allows analysing the intrinsic characteristics of the population. On the other,

167 the infrastructure dimension allows the analysis of buildings and critical facilities, to consider their potential worsening  
 168 implications for the populations, following the rational described in González-Riancho et al. (2014). In this sense, it is  
 169 considered that an increase in the number of victims is likely to occur due to the loss or damage of emergency services, or the  
 170 recovery capacity may decrease due to the loss of strategic socioeconomic infrastructures such as ports.  
 171 The criteria to analyse the human dimension **are** the population capacities related to their mobility and evacuation speed, and  
 172 the ability to understand a warning message and an alert situation. The criteria determined to analyse the infrastructure  
 173 dimension **are** the critical buildings housing a large number of people (schools, hospitals, etc.), the emergency facilities and  
 174 infrastructures, the supply of basic needs, the building and infrastructures that could generate negative cascading effects, and  
 175 the economic consequences.  
 176 Consequently, a set of 11 indicators has been defined (see Table 1) to develop a framework that allows to encompass the major  
 177 issues related to the community's vulnerability This framework was developed in agreement with local stakeholders and  
 178 international experts through the participatory process.  
 179

| Index                              | Indicator                                                      | Variable                                                                                      |
|------------------------------------|----------------------------------------------------------------|-----------------------------------------------------------------------------------------------|
| Human Vulnerability Index          | Human Exposure<br>H1 - Population                              | Number of persons exposed                                                                     |
|                                    | H2 - Sensitive age groups                                      | Number of persons <10 and > 65years                                                           |
|                                    | Human Sensitivity<br>H3 - Disability                           | Number of disabled persons (physical / intellectual)                                          |
|                                    | H4 - Illiteracy                                                | Number of illiterate persons                                                                  |
|                                    | H5 - Expatriates                                               | Number of expatriates                                                                         |
| Infrastructure Vulnerability Index | Infrastructures Exposure<br>I1 - Buildings and infrastructures | Number of exposed buildings and infrastructures                                               |
|                                    | I2 - Critical buildings                                        | Number of critical buildings (health, educational, religious, cultural, governmental)         |
|                                    | I3 - Emergency                                                 | Number of emergency infrastructures (civil defence, police, firemen, military, royal guard)   |
|                                    | Infrastructures Sensitivity<br>I4 - Supply                     | Number of water supply (desalination plants) and energy supply (power plants) infrastructures |
|                                    | I5 - Dangerous                                                 | Number of dangerous/hazardous infrastructures                                                 |
|                                    | I6 - Strategic                                                 | Number of strategic infrastructures (ports and airports)                                      |

180 **Table 1. Exposure and sensitivity indicators built for the tsunami vulnerability assessment in Oman.**

181 Indicators H1 and I1 **identify** and **locate** the number and type of exposed population and infrastructures respectively, **i.e. the**  
 182 **number of people and buildings and infrastructures located in the flooded area**. The human indicators H2-H5 are oriented to  
 183 measure weaknesses in terms of evacuation and reaction capacities of the exposed population. Specifically, H2 and H3 are  
 184 related to problems with mobility and evacuation velocity whereas H2, H3, H4 and H5 are related to difficulties in  
 185 understanding a warning message and an alert situation.

186 The infrastructure indicators I2-I6 measure the number of critical facilities and buildings that would be affected by  
 187 administrative area, bearing in mind the implications for the population. I2 provides the number of buildings that would require  
 188 a coordinated and previously planned evacuation due to the high number of people in them (in some cases sensitive population),  
 189 such as hospitals, schools, geriatrics, malls, stadiums, mosques, churches, etc. I3 calculates the loss of emergency services that  
 190 are essential during the event. I4 reports on the potential number of power plants and desalination plants affected, hindering  
 191 the long-term supply of electricity and water to local communities. I5 analyses the generation of cascading impacts that could  
 192 take place due to affected hazardous/dangerous industries. Finally, I6 considers the loss of strategic ports and/or airport  
 193 infrastructures, essential for the economy of the country and the local livelihoods (fishing ports).

194 The construction of vulnerability indexes is performed through the weighted aggregation of the previously normalized  
 195 indicators via the min-max method **(OECD, 2008)**. Aggregated indexes are then classified considering the data distribution

196 via the natural breaks method (Jenks, 1967) and grouped in five classes, obtaining homogeneous vulnerability areas that are  
 197 expected to need similar DRR measures.  
 198 Indicators and indexes have been applied to every wilayat along the coast of Oman (wilayat is an administrative division in  
 199 Oman). Comparable results are obtained among all areas due to the methods of normalization and classification, which take  
 200 into account the values of the index for all areas when establishing classes' thresholds. This method depends on the distribution  
 201 of the data, therefore the study of any index evolution over time, for comparable purposes, must maintain the thresholds  
 202 established in the initial analysis. In the same way, if new study areas were added, they should be included and new thresholds  
 203 should be established.

204 **2.3 Risk Assessment**

205 Risk results are obtained by combining hazard and vulnerability components through a risk matrix (Greiving et al., 2006;  
 206 Jelínek et al., 2009; Aguirre-Ayerbe, 2011; González-Riancho et al., 2014; Schmidt-Thomé, 2006; ESPON, 2006; IH  
 207 Cantabria-MARN, 2010 and 2012 projects). Classes derived from the hazard assessment are blended with vulnerability classes  
 208 by means of a risk matrix, as shown in Figure 4, to obtain two types of results, partial risks for each dimension and a combined  
 209 risk result from the weighted aggregation of both dimensions. The results are finally classified into five risk classes.

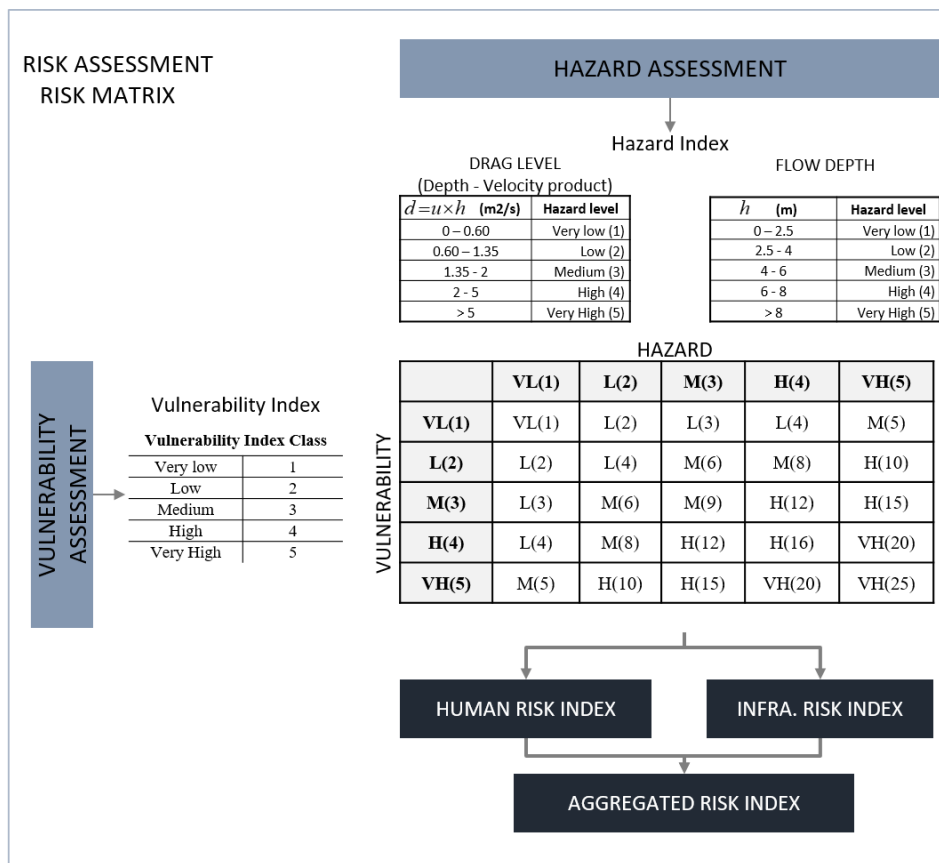

210  
 211 **Figure 4. Risk matrix combining hazard and vulnerability classes.**

212 The hazard variable differs according to each dimension of the study to analyse specifically the potential impacts. The  
 213 combination of water depth and velocity, as a proxy for the drag force, which is related to the loss of people's stability (Jonkman  
 214 et al., 2008), is applied to the human dimension whereas the flow depth variable is applied to the infrastructure dimension.  
 215 The results obtained from the risk matrix reveal areas at high risk, which are expected to have serious negative consequences  
 216 due to the combination of hazard and vulnerability conditions. In-depth analysis of these areas allows to identify the causes of  
 217 these results and to propose adequate RRM according to each of the components, dimensions and variables considered to  
 218 perform the risk assessment.

219 **2.4 Risk reduction measures**

220 A method has been developed to identify, recommend and prioritize most-suitable alternatives for tsunami risk reduction based  
 221 on the risk analysis and site-specific conditions. The very first step has been the development of a RRM catalogue, to finally  
 222 obtain a set of site-specific and target-oriented countermeasures. This method facilitates the decision-making process by  
 223 connecting scientific and technical results with risk management.

224 The work focuses on the straightforward feeding/reduction relation among the different risk components (i.e. hazard, exposure  
 225 and vulnerability) and the risk reduction measures focused on the pre-event stage (see Figure 5).

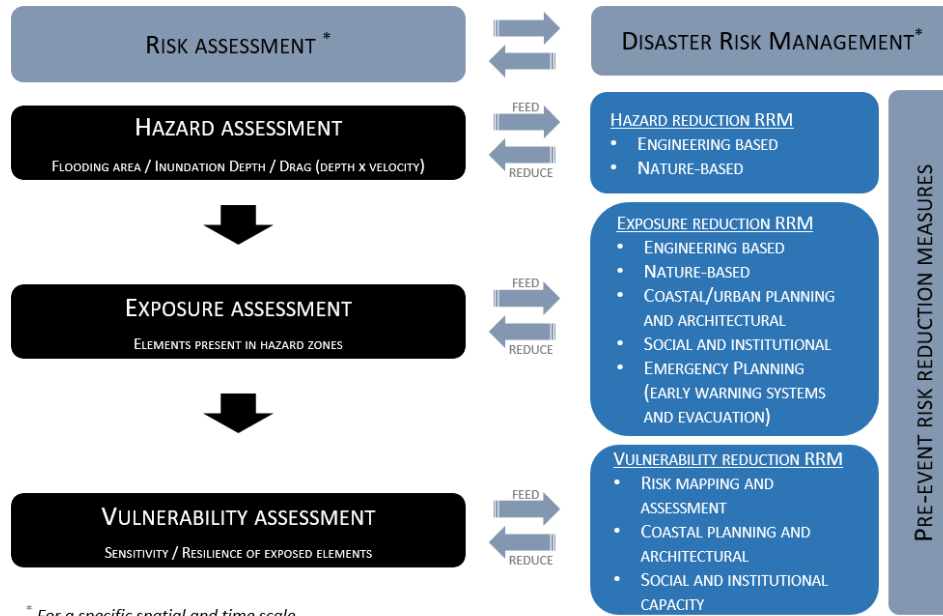

226  
 227 **Figure 5. Interactions between the different components of risk assessment and the pre-event approaches of risk reduction measures**

228 Accordingly, two main strategies are identified to achieve a long-term coastal flooding risk reduction: preparedness and  
 229 prevention, which are based on the concepts defined by UN (2016) and UNISDR (2009).

230 Preparedness actions focus on the knowledge, capacities and skills developed to anticipate and respond to the impacts of the  
 231 event, and include the following: (i) risk assessment and mapping, (ii) social and institutional awareness, educational and  
 232 capacity building measures, and (iii) emergency measures. The risk assessment and planning is the first step of the risk  
 233 management cycle, providing essential guidance within the decision-making process. The social and institutional measures  
 234 enhance the knowledge and capacities developed by communities and individuals to effectively anticipate and respond to the  
 235 impacts of likely, imminent or current hazard events, as stated by UN (2016). The emergency measures ensure public safety  
 236 by issuing alerts and planning evacuation of people and certain goods (e.g. vessels) at risk, to safe areas or shelters when a  
 237 tsunami is detected. There are some other preparedness measures, which are oriented to the post-event phase of the disaster  
 238 management, such as contingency planning, stockpiling of equipment and supplies and arrangement for coordination.

239 Prevention refers to actions that aim at shielding or protecting from the hazard through activities taken in advance, by reducing  
 240 the hazard itself, the exposure to that hazard or the vulnerability of the exposed people or goods. These include (i) engineering-  
 241 based measures, (ii) nature-based measures, and (iii) coastal planning and architectural measures. The engineering-based  
 242 measures, i.e., controlled disruption of natural processes by using long term man-made structures (hard engineering solution)  
 243 help to reduce the intensity of the hazard. The nature-based measures, i.e., the use of ecological principles and practices (soft  
 244 engineering solution) help to reduce the intensity of the hazard and to enhance coastal areas safety while boosting ecological  
 245 wealth, improving aesthetics, and saving money. The coastal planning and architectural measures, i.e. regulations and good  
 246 practices, reduce the exposure and vulnerability mainly related to the infrastructure dimension.

247 Table 2 shows the set of RRM developed (based on UNFCC, 1999; Nicholls et al., 2007; UNESCO, 2009a, Linham et al.,  
 248 2010), organised by strategies, approaches and specific goals.



| Strategy     | Approach                           | Code  | Mitigation measure                         | Specific Goal        |
|--------------|------------------------------------|-------|--------------------------------------------|----------------------|
| Preparedness | Risk Mapping and Assessment        | RA. 1 | Hazard, Vulnerability and Risk             | V                    |
|              | Social and institutional capacity  | PR. 1 | Raising awareness                          | E <sub>t</sub> and V |
|              |                                    | PR. 2 | Capacity building                          |                      |
|              |                                    | PR. 3 | Education                                  |                      |
|              | Emergency planning                 | EM. 1 | Early Warning Systems                      | E <sub>t</sub>       |
|              |                                    | EM. 2 | Evacuation planning                        |                      |
| Prevention   | Engineering-based                  | EN. 1 | Seawalls and sea dykes                     | H                    |
|              |                                    | EN. 2 | Breakwaters                                |                      |
|              |                                    | EN. 3 | Movable barriers and closure dams          |                      |
|              |                                    | EN. 4 | Land claim                                 |                      |
|              | Nature-based                       | NA. 1 | Managed realignment                        | H                    |
|              |                                    | NA. 2 | Beach nourishment                          |                      |
|              |                                    | NA. 3 | Artificial sand dunes and dune restoration |                      |
|              |                                    | NA. 4 | Living shorelines                          |                      |
|              |                                    | NA. 5 | Wetland restoration                        |                      |
|              | Coastal Planning and Architectural | PL. 1 | Building standards                         | V                    |
|              |                                    | PL. 2 | Flood proofing                             |                      |
|              |                                    | PL. 3 | Coastal setbacks                           | E <sub>p</sub>       |

249 **Table 2. Strategies, approaches, measures and specific goals for risk reduction derived from coastal risk due to tsunami hazard (H:**  
250 **hazard, E<sub>p</sub>: permanent exposure, E<sub>t</sub>: temporary exposure, V: vulnerability).**

251 The catalogue has been developed following this concepts and structure. Each measure is analysed and characterised by means  
252 of individual RRM-cards that include the specific objective pursued and description of the measure in several sections:  
253 rationale, preliminary requirements, supplementary measures, efficiency, durability and initial cost analysis. Each card  
254 includes a list of stakeholders involved in the implementation of the specific RRM in Oman, and the estimation of the current  
255 capacity for implementation, based on the information provided by the stakeholder panel of experts. Each card also contains a  
256 scheme, several figures and a suitability analysis, which is performed through a SWOT analysis. Finally, it is incorporated a  
257 specific bibliographic reference list that permits a deeper study of each measure.

258 This RRM catalogue is the basis for the next step, the selection and prioritization of the specific set of countermeasures for  
259 each area. It is also worth to mention that a combination of measures from different approaches often offers an effective risk  
260 reduction strategy, even enhancing the performance of the individual measures when implemented at the same time.

261  
262 The methodology for the selection and prioritization of the RRM has been designed to ensure its adequacy to site-specific  
263 conditions at local scale among those proposed in the catalogue. It is summarized in three main steps (see Figure 6): (i)  
264 determination of the hotspots, (ii) selection of the recommended RRM through a decision matrix and (iii) the prioritization of  
265 RRM.

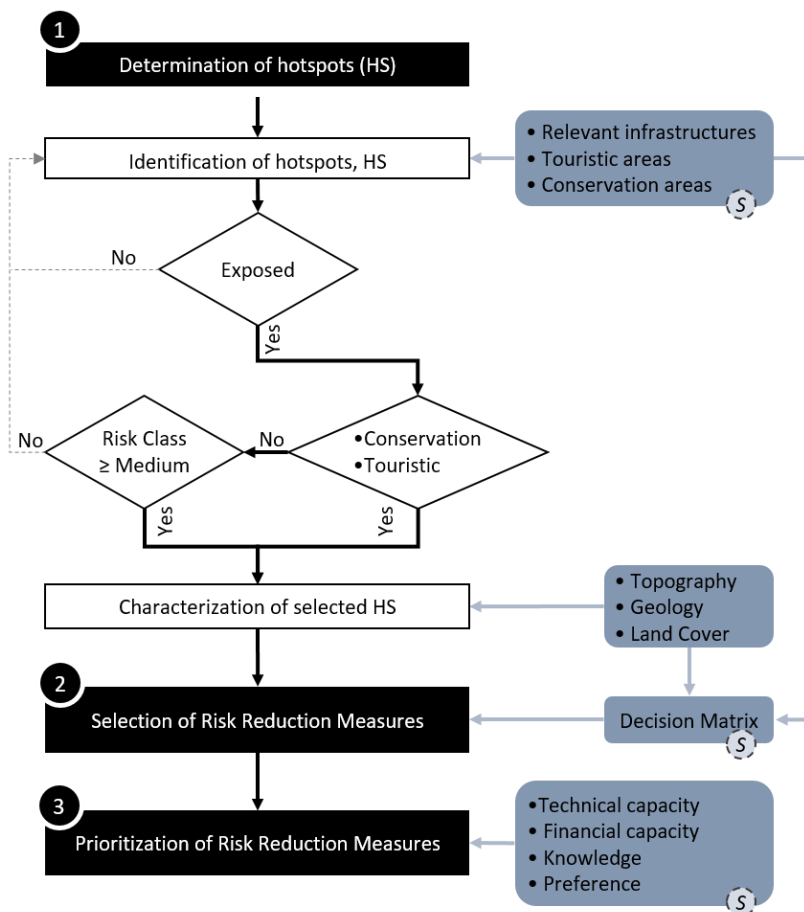

266

267 **Figure 6. Scheme of the methodology for the prioritization of recommended tsunami risk reduction measures (S: participation of**  
 268 **stakeholder panel of local and international experts on coastal and risk management).**

269 **2.4.1 Determination of hotspots**

270 The first step is the determination of hotspots, which are the zones in which RRM will be further proposed. Coastal hotspots  
 271 (HS) are identified in consensus with the stakeholder panel, including built-up populated areas and the following areas of  
 272 special interest: (i) relevant infrastructures such as transport and communications infrastructures (airports and sea-ports),  
 273 supply infrastructures (power and water) and dangerous infrastructures (refineries, dangerous industries areas and military  
 274 bases); (ii) touristic regions, where there is significant seasonal variation in the population and (iii) environmental conservation  
 275 areas, to consider the fragile and complex systems where the coastal ecosystems converge with the marine dynamics and the  
 276 human activities, which include lagoons, mangroves and turtle nesting areas.

277 After the identification of the HS, it is evaluated whether they are exposed to tsunami hazard (i.e. located in the flooded area)  
 278 and if they exceed the risk class threshold as shown in Figure 6, in order to determine the units that will feed the decision  
 279 matrix into the second phase. Because of their significance, the scarcity of data when performing the vulnerability assessment  
 280 and the relevance given by local stakeholders, touristic regions and environmental conservation areas will move to the next  
 281 step if the HS is exposed, regardless the risk level. In all other cases, for those HS under very low, low risk or not expose, no  
 282 countermeasures will be assigned. The HS characterization is carried out by assigning elevation characteristics (highlighting  
 283 low-lying areas and wadis), a geology categorization (bare consolidated or non-consolidated substratum) and the land cover  
 284 (cropland, built-up areas and vegetation-covered areas).

285 **2.4.2 Selection of risk reduction measures**

286 The second stage consists in the preliminary assignment of RRM to each HS according to the decision matrix. The matrix,  
 287 which was validated by the stakeholder panel, is fed by the specific characteristics of each HS and by type of HS, as described

288 previously. Table 3 shows the decision matrix, already sorted by the ratings of the stakeholder panel of experts on coastal risk  
 289 management in Oman, as explained in section 2.4.3.  
 290 The assignment of each recommended measure (highly recommended, recommended or not recommended) is based on the  
 291 information described in each of the RRM-cards and depends on the characteristics that have determined the type HS. On one  
 292 hand, the topography of the area, with a focus on the low-lying areas and wadis, where coastal and pluvial flooding occurs on  
 293 a regular basis, at least annually. Likewise, the geology and land cover is analysed to consider the bedrock and type of land  
 294 use, that condition the suitability of one or another measure. Finally, as shown in the decision matrix, the type of hotspot also  
 295 conditions the suitability of the RRM preliminary selection. The sets of RRM obtained according to the decision matrix for  
 296 each of the determinants are merged, and finally the most restricted recommendation is considered.

| RRM Code | Risk Reduction Measure                         | Topography<br>Flood prone areas<br>(Low-lying/wadis) | Geology                    |                   |          | Land cover |                          |                       | Types of HS          |                 |                          |    | Prioritization<br>Stakeholders ranking |
|----------|------------------------------------------------|------------------------------------------------------|----------------------------|-------------------|----------|------------|--------------------------|-----------------------|----------------------|-----------------|--------------------------|----|----------------------------------------|
|          |                                                |                                                      | Bare non -<br>consolidated | Bare consolidated | Built-up | Crop land  | Covered by<br>vegetation | Lagoons/<br>mangroves | Turtle nesting areas | Touristic areas | Relevant infrastructures |    |                                        |
| PR. 1    | Social and Institutional<br>Raising awareness  | ++                                                   | +                          | +                 | ++       | +          | +                        | ++                    | ++                   | ++              | ++                       | 1  |                                        |
| EM. 1    | Emergency Planning<br>Early Warning<br>Systems | ++                                                   | +                          | +                 | ++       | +          | +                        | +                     | +                    | ++              | ++                       | 2  |                                        |
| PR. 3    | Social and Institutional<br>Education          | ++                                                   | +                          | +                 | ++       | +          | +                        | ++                    | ++                   | ++              | ++                       | 3  |                                        |
| RA. 1    | Hazard, Vulnerability<br>and Risk Assessment   | ++                                                   | ++                         | ++                | ++       | ++         | ++                       | ++                    | ++                   | ++              | ++                       | 4  |                                        |
| EM. 2    | Emergency Planning<br>Evacuation planning      | ++                                                   | +                          | +                 | ++       | ++         | +                        | +                     | +                    | ++              | ++                       | 5  |                                        |
| PR. 2    | Social and Institutional<br>Capacity building  | ++                                                   | +                          | +                 | ++       | +          | +                        | ++                    | ++                   | ++              | ++                       | 6  |                                        |
| EN. 2    | Breakwaters                                    | ++                                                   | +                          | +                 | ++       | +          | +                        | -                     | -                    | +               | ++                       | 7  |                                        |
| NA. 3    | Artificial sand dunes<br>and dune restoration  | ++                                                   | ++                         | +                 | -        | +          | ++                       | -                     | ++                   | +               | +                        | 8  |                                        |
| NA. 4    | Living shorelines                              | ++                                                   | +                          | -                 | ++       | +          | ++                       | ++                    | ++                   | +               | +                        | 9  |                                        |
| PL. 3    | Coastal setbacks                               | ++                                                   | +                          | +                 | ++       | +          | ++                       | +                     | +                    | +               | +                        | 10 |                                        |
| NA. 5    | Wetland restoration                            | ++                                                   | +                          | -                 | -        | +          | ++                       | ++                    | ++                   | +               | +                        | 11 |                                        |
| PL. 1    | Building standards                             | ++                                                   | +                          | +                 | ++       | +          | +                        | +                     | +                    | +               | +                        | 12 |                                        |
| EN. 4    | Land claim                                     | ++                                                   | +                          | +                 | +        | +          | +                        | -                     | -                    | +               | ++                       | 13 |                                        |
| NA. 2    | Beach nourishment                              | ++                                                   | ++                         | +                 | -        | +          | ++                       | -                     | ++                   | +               | +                        | 14 |                                        |
| PL. 2    | Flood proofing                                 | ++                                                   | +                          | +                 | ++       | +          | +                        | +                     | +                    | +               | +                        | 15 |                                        |
| NA. 1    | Managed realignment                            | ++                                                   | +                          | -                 | -        | +          | +                        | -                     | ++                   | +               | +                        | 16 |                                        |
| EN. 1    | Seawalls and sea dykes                         | ++                                                   | +                          | +                 | ++       | +          | +                        | -                     | -                    | +               | ++                       | 17 |                                        |
| EN. 3    | Movable barriers and<br>closure dams           | ++                                                   | +                          | +                 | ++       | +          | +                        | -                     | -                    | +               | ++                       | 18 |                                        |

297 **Table 3. Decision matrix for the selection of recommended RRM (+: highly recommended; ++: recommended; -: not recommended).**  
 298 **Last column: prioritization of RRM according to the stakeholder panel ratings on Oman risk management. The matrix is presented**  
 299 **ordered by these prioritization results.**

300 **2.4.3 Prioritization of risk reduction measures**

301 Finally, in the third phase, the prioritization analysis considers the characteristics of each measure, its technical and economic  
 302 requirements, efficiency and durability, the SWOT analysis and the capacity of the country to implement them. In addition to  
 303 technical criteria, there are subjective aspects, including local knowledge and expertise, which should be taken into account  
 304 when selecting certain recommended RRM as preferred over others. Results of this preferences, shown in figure Figure 7, are  
 305 also reflected in the sorting of Table 3, based on the last column.

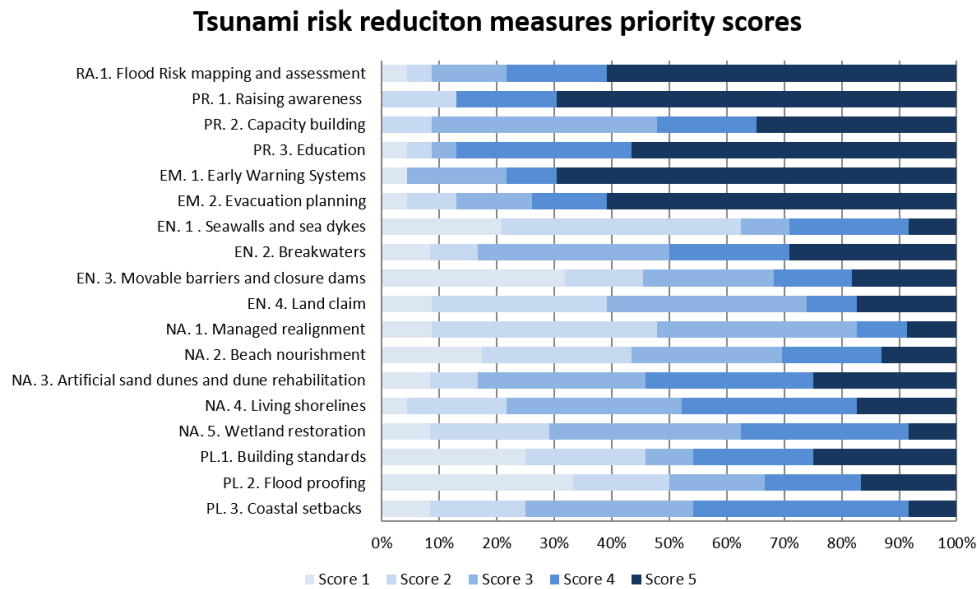

306  
 307 **Figure 7. Scoring of the RRM according to the stakeholder panel ratings (1: the least preferred; 5: most preferred)**

308 **3 Results**

309 This section presents two types of results. First, sections 3.1 Tsunami risk assessment and 3.2 Tsunami risk reduction in  
 310 Oman deal with technical results obtained from the application of the methodology to the Sultanate of Oman. Section 3.1  
 311 Tsunami risk assessment describe the most relevant results of the tsunami risk assessment and 3.2 one example regarding the  
 312 risk reduction measures selected and prioritized for a specific site. Finally, section 3.3 Science-based support for the tsunami  
 313 DRR decision making process describe the management tools developed and its usefulness for the tsunami DRR decision-  
 314 making process.

315 **3.1 Tsunami risk assessment**

316 The tsunami hazard analysis indicates that the greater flooded area is located in the northern plain and in one section of the  
 317 eastern face of the country, as shown in figure Figure 8a (country’s wilayats are sorted from north to south in this and following  
 318 graphs). However, the greatest flooded area does not necessarily yield the greatest the impact. In fact, the vulnerability analysis  
 319 show that the elements at risk are not homogenously distributed along these flooded areas. The greatest values for the exposure  
 320 are on the northern plain, especially between Shinas and Bawshar Wilayats (see figure Figure 8b and Figure 8c). Saham,  
 321 Suwayq, Al Musanaah, Barka and As Seeb Wilayats have the highest percentage of exposed population, all above 10%, the  
 322 latter two more than 15%, whereas there is almost no exposure in the coastline from Sur to Dalkut Wilayats, with most of  
 323 relative values below 1%. The Wilayat Al Jazir, even if having a low absolute number of exposed population, represents about  
 324 8% of the total, ranking on the side of the most exposed in relative terms. Regarding the exposure of buildings and  
 325 infrastructures, the pattern is very similar. The highest rates of exposure take place in the northern area, especially from Sinas  
 326 to As Seeb Wilayats (with exposure values over 40%), with the exception of Liwa. In the rest of the country, Jaalan Bani Bu  
 327 Ali and Al Jazir have the highest values, with 45% (about 8,300 items) and 25% (about 750 elements) respectively.

328 The vulnerability assessment reveals the different characteristics of each wilayat in terms of both population and infrastructure,  
329 being the highest values correlated to the highest exposure values. In general, the most representative variables of the human  
330 vulnerability assessment along the entire coast are the “expatriates” and the “sensitive age groups”, both around the 30% of  
331 the total population exposed (Figure 8b). The variable that contributes less to the human vulnerability is “disable”, but even if  
332 not very representative in relative values (about 2% of total exposure), it was maintained in the analysis because of its relevance  
333 and importance within the risk assessment.

334 As for the infrastructure dimension (Figure 8c and Figure 8d), the vulnerability analysis highlights that “critical buildings”  
335 category are the most affected, being around 96% of all sensitive and exposed buildings. The 70% of the buildings within this  
336 class are religious, being the wilayats Saham and As Suwayq the most affected. Despite their lower absolute number, it is  
337 necessary to consider the other variables that feed the infrastructure vulnerability analysis due to their significant relevance in  
338 case of an emergency (emergency, supply, dangerous and strategic), as described in the risk assessment section. In this sense,  
339 Figure 8d shows their distribution along the coastal wilayats, highlighting Sohar, where ten petrochemical industries, three  
340 container terminals, two bulk liquid terminals, one general cargo terminal and a sugar refinery could be affected. All of these  
341 industries are located within the area and surroundings of the Port of Sohar.

342

343 Integrated vulnerability results are shown in Figure 9a for both human and infrastructure dimensions. According to the  
344 vulnerability classification, the colour ramp varies from green to red, being the green the lowest value of the index and red the  
345 highest. Note that, for a better understanding, the representation is at the wilayat level, while the vulnerability analysis is  
346 performed exclusively for the potentially inundated area due to the tsunami hazard considered. The highest vulnerability scores  
347 mainly corresponds with the wilayats located in the northern plain area. Analysing the differences among them, it may be  
348 concluded that the most vulnerable wilayats (sorted from north to south) are Sohar, Saham (highest IVI score), As Suwayq,  
349 Barka, As Seeb (highest HVI score) and Bawshar.

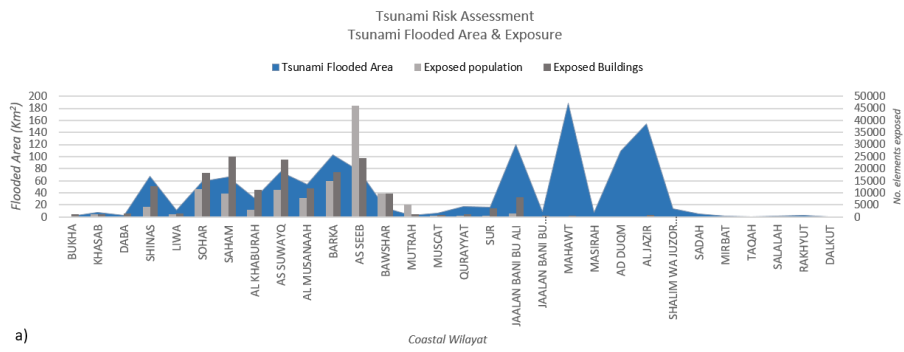

a)

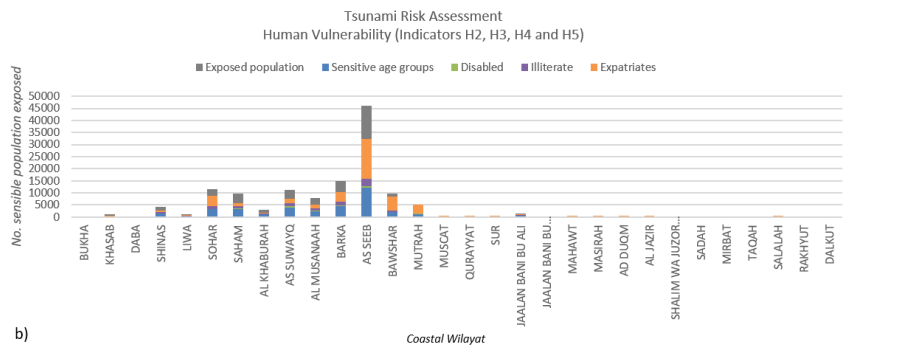

b)

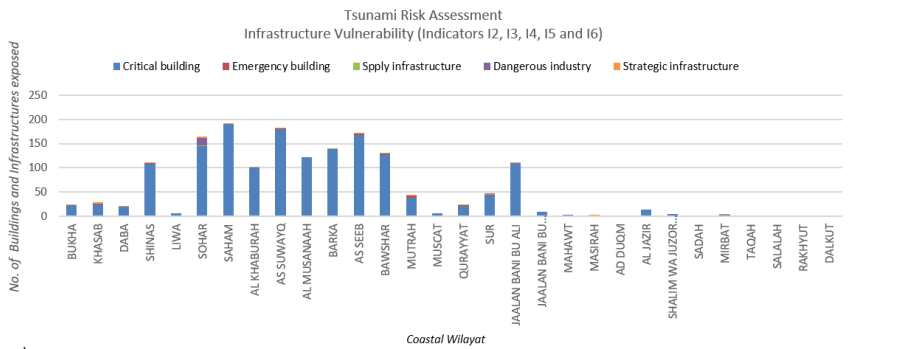

c)

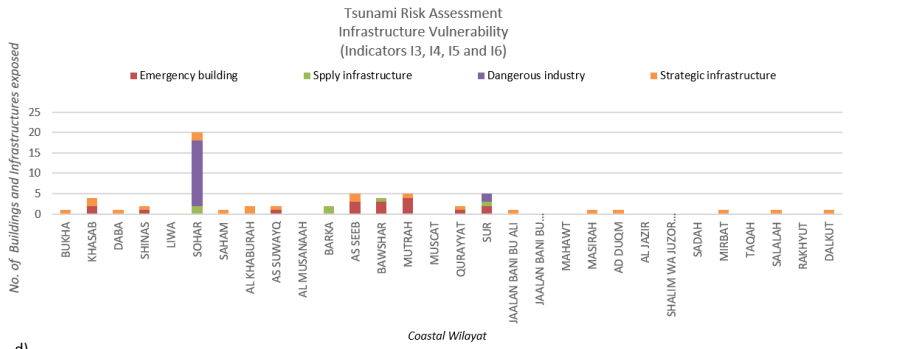

d)

350  
351 **Figure 8. Tsunami Risk assessment: (a) Tsunami flooded area and exposure, (b) Human exposure and vulnerability variables, (c)**  
352 **and (d) Infrastructures exposure and vulnerability variables.**

353 Finally, Figure 9b shows the integrated risk map as a synthesis, indicating the amount of area disaggregated by each risk level  
354 and wilayat, which permits to know the amount of population and infrastructures per level. Therefore, it is shown that the  
355 northern area of the country would be the most affected by the tsunami scenario modelled in this work, both because of the  
356 greater impact of the hazard and the higher degree of exposure and vulnerability.

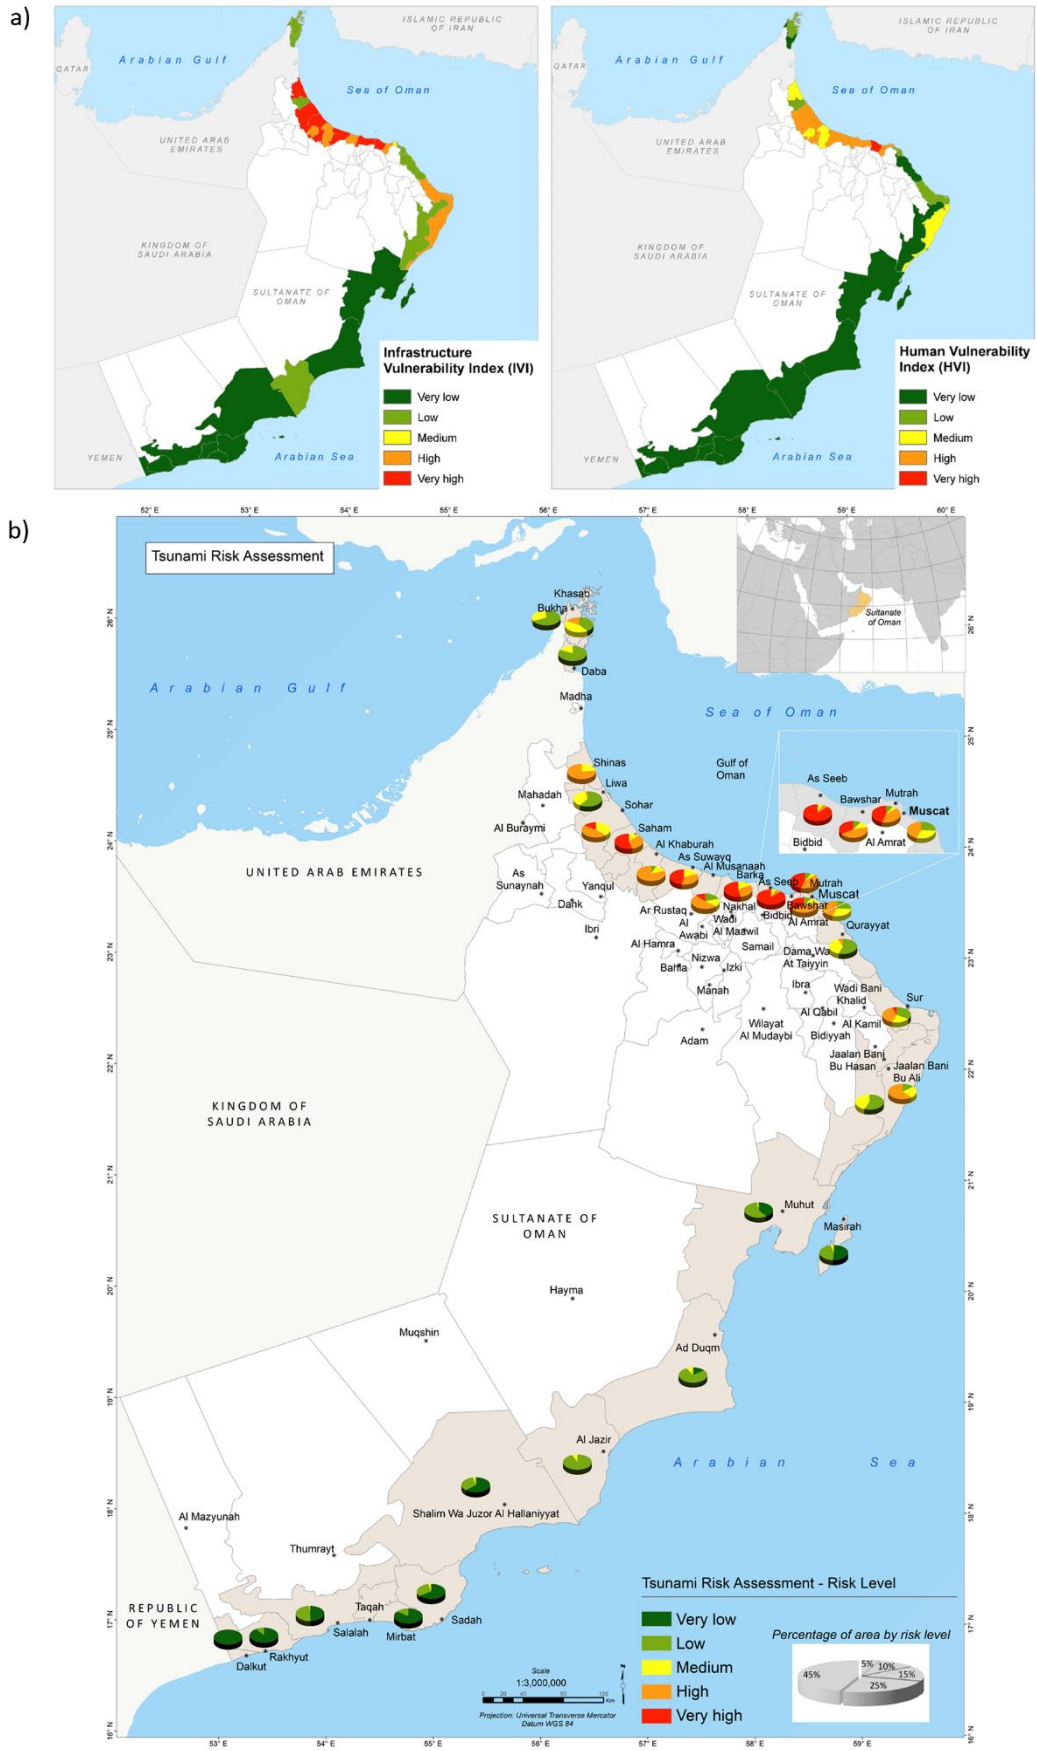

357

358 **Figure 9. (a) IVI and HVI: Infrastructure and human vulnerability indexes; (b) Integrated tsunami risk assessment**

359 Summarizing tsunami risk results, Figure 10a shows the distribution of the exposed population by risk level and wilayat, the  
 360 greater consequences being on As Seeb and Barka wilayats. Almost 55% of the exposed population is located in very high-  
 361 risk areas and around 25% in high-risk areas. Regarding the infrastructure dimension, most of the exposed built-up area is  
 362 located in medium risk zones (about 60%), and around a 25% in high-risk zones. Less than 1% of the built up area result in  
 363 very high infrastructure risk areas. Built-up area by risk level and wilayat is presented in Figure 10b, showing that Sohar and  
 364 As Seeb are the most affected wilayats both in terms of built-up area exposure and risk level.

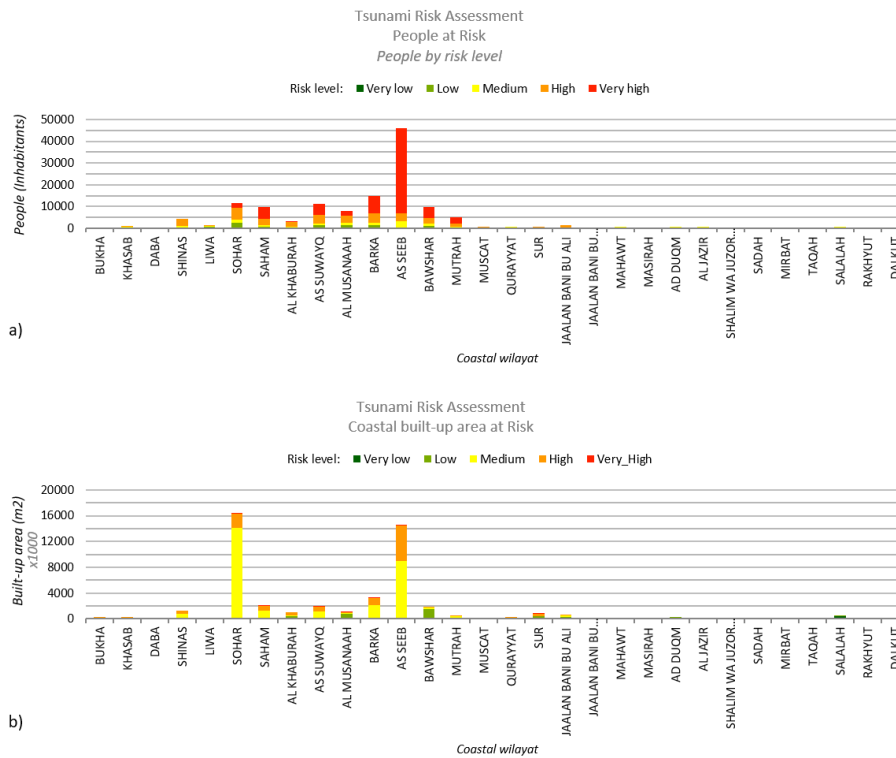

365  
 366 **Figure 10. People and built up area by risk level**

367 **3.2 Tsunami risk reduction in Oman**

368 The methodology applied for the selection and prioritization of optimal RRM, resulted in the identification of 89 hot spots  
 369 (HS) along the entire coast of the country, half of them located on the north coast, mainly from Liwa to Sur wilayats. About  
 370 25% of them are concentrated in the southeast area of the country, especially in wilayats Salalah (12) and Sadah (9). Mashira  
 371 and Ad Duqm concentrates 10 and 5 HS respectively. According to the method followed, 79 out of the initial 89 were assigned  
 372 with a set of RRM.

373 Next, an example is included to show the whole procedure, focused on the wilayat As Seeb. This wilayat concentrates the  
 374 largest amount of population exposed to the highest level of risk and is the second wilayat with the greatest infrastructures risk  
 375 level. The target area (the HS) is the Muscat International Airport and surroundings where, in addition to the airport itself the  
 376 building of the Public Authority for Civil Aviation of Oman (PACA) that houses the Multi Hazard Early Warning System and  
 377 the National Tsunami Warning Centre **is located**.

378 Figure 11 shows the selected HS, a simple view of the risk assessment results, a summary of the characterization, and the  
 379 preliminary set of RRM recommended resulting from the decision matrix. The list is sorted (most preferred on top) according  
 380 to the prioritization made by the stakeholder panel, based on their knowledge and expertise on the feasibility and the  
 381 institutional, economic and technological capacity of the country for their implementation.



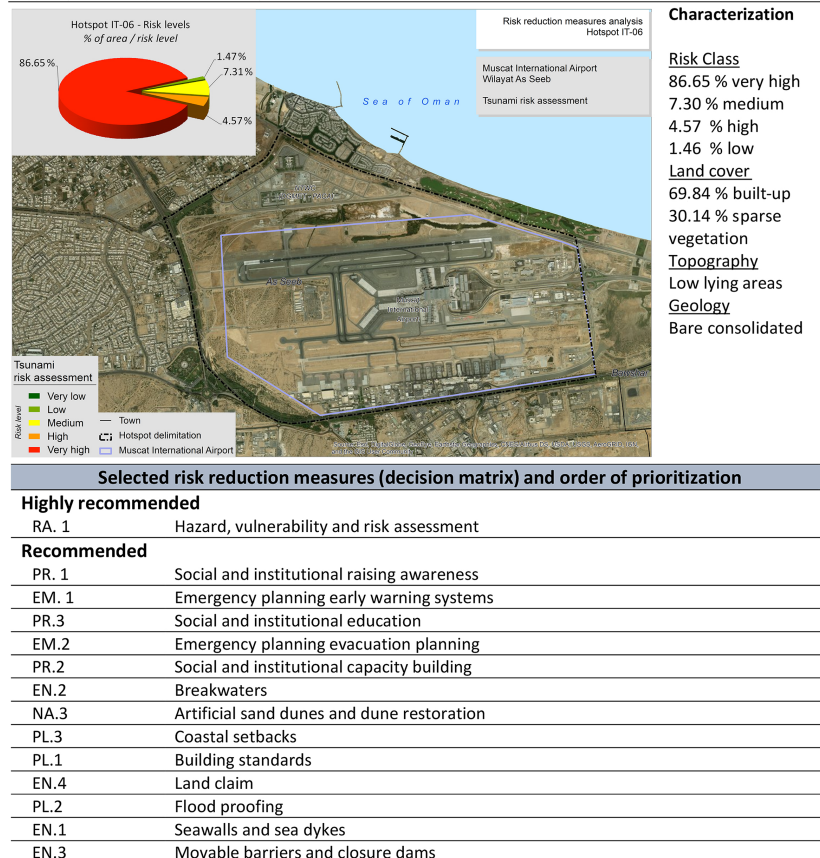

382

383 **Figure 11. RRM preliminary proposal for Wilayat As Seeb relevant infrastructure area**

384 The first six recommended RRM are related to the preparedness strategy. Based on this result, the implementation of these  
 385 measures require specific supplementary studies at a greater resolution. These may be: high-resolution data collection for the  
 386 risk analysis (topo-bathymetry, tsunamigenic sources characterization, and vulnerability), in-depth numerical modelling of the  
 387 flooding physical process, development of a strategy for education of critical groups (most vulnerable members, leaders,  
 388 institutions, government, educators, etc.), and the cooperation between the government, relief agencies and local communities  
 389 to enhance the early warning systems and the evacuation planning process.

390 Regarding the prevention strategy, the first recommended countermeasure is the construction of breakwaters (EN. 2 in  
 391 Figure 11). Tsunami breakwaters are usually constructed in the mouth of a bay or estuary, not in open coasts. However,  
 392 according to the general workflow developed and presented in Figure 1 (point 6) a detached breakwater has been modelled  
 393 to understand the efficiency of the measure. The model resulted in a local increase in the elevation of the waves in the study  
 394 area **due to the transformation that the breakwater generates in the tsunami waves. The waves overtop the structure**  
 395 **generating an acceleration of the flow that penetrates inland, thus increasing the flooded area** (see Figure 12 Figure 12b and  
 396 Figure 12c). Therefore, although more detailed studies would be necessary, this prevention measure should be discarded at  
 397 this site. The second recommended prevention measure is the “artificial sand dunes and dune restoration”. Accordingly, a  
 398 more detailed study has been done in a subset of the area by means of modelling an artificial sand dune with a crest height of  
 399 3 metres, showing an efficient reduction of the flooded area, as shown in Figure 12d.

400

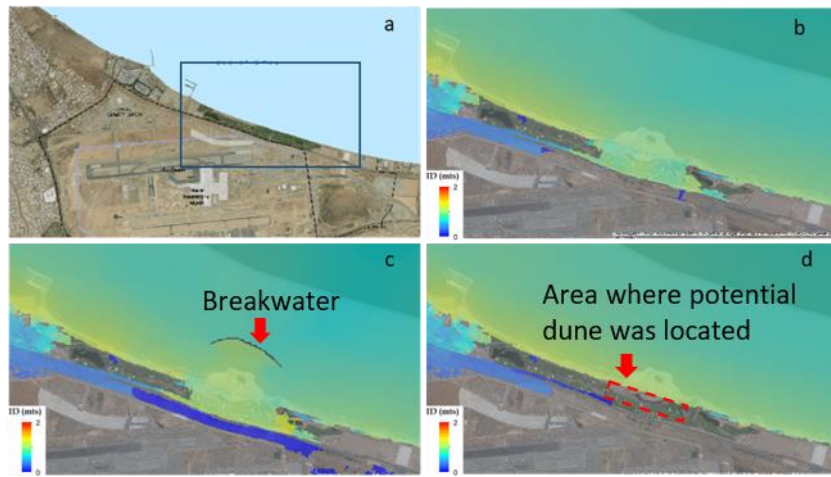

401  
 402 **Figure 12 . Detailed analysis of preliminary engineering RRM: a) Zoomed sample area; b) Modelled flooded area; c) with the**  
 403 **breakwater option; d) with artificial sand dune option.**

404 Similar procedures for obtaining a preliminary set of RRM have been developed for all the hotspots and for some local areas.  
 405 In-depth studies should be made to perform a second stage analysis of the recommended countermeasures, considering higher  
 406 resolution of the hazard analysis and detailed information provided by the vulnerability variables and indicators.

### 407 3.3 Science-based support for the tsunami DRR decision making process

408 One of the main objectives of the study is to improve tsunami risk management through the effective use of the results  
 409 obtained. In this sense, science and technical results are translated into two risk management tools: (i) the Tsunami Hazard,  
 410 Vulnerability and Risk Atlas, and (ii) the Risk Reduction Measures Handbook. These tools have been implemented and  
 411 activated by the Directorate General of Meteorology of Oman (DGMET). In addition, a knowledge and technology transfer  
 412 strategy has been carried out to ensure adequate long-term management.

413 The “Tsunami Hazard, Vulnerability and Risk Atlas”, contains a comprehensive description of the methodology applied to  
 414 assess the risk and all maps from the hazard analysis and vulnerability variables and indices to the final risk results. It is  
 415 expected to be used as the main source for awareness and education regarding tsunamis and as the basis for further local and  
 416 detailed studies. In this regards, DGMET efforts are focused in distributing and conducting follow-up meetings to all  
 417 involved stakeholders, including Supreme Council for Planning, Ministry of Education, The Public Authority Of Radio And  
 418 Television, National Committee for Civil Defence (NCCD), Public Authority for Civil Defence and Ambulance and Royal  
 419 Oman Police-Operation. Follow up meetings are also included in the general strategy to explain the atlas information and  
 420 discuss the best approaches to utilize such information for the planning and implementing policies and strategies.

421 The “Tsunami Risk Reduction Measures Handbook” is a useful manual to help in the decision-making process related with  
 422 the tsunami prevention and preparedness. It includes a brief explanation of the methodology developed to select and  
 423 recommend each set of measures, the catalogue of RRM, containing individual RRM-cards for each countermeasure and the  
 424 results obtained for each area along the coast of Oman, including the set of recommended RRM for each specific location.  
 425 Similar to the hazard, vulnerability and risk atlas, DGMET has forwarded the handbook to the government cabinet to  
 426 distribute among all stakeholders, especially to the Supreme Council for Planning.

427 Finally, as an additional result of this study, a web based tool to support the tsunami early warning system (called MHRAS)  
 428 was also developed, implemented and linked to the DGMET Decision Support System.

429 **These tools are the necessary starting point for the development of a strategy for education, raising awareness and capacity**  
 430 **building of emergency management authorities and society in general.**

431

#### 432 4 Conclusions

433 Integrated risk assessments are essential for identifying the most vulnerable communities and worst expected consequences,  
434 as well as for designing and planning a roadmap towards risk reduction. For this reason, they should be the basis to link  
435 scientific and technical advances with appropriate decision-making and effective risk management.

436 The methodology presented was developed to build an effective connection between tsunami risk assessment and tsunami risk  
437 reduction, with the objective of supporting risk managers by facilitating science-based decision-making in the phases of  
438 prevention and preparedness, before an event occurs.

439 The tsunami hazard modelling, based on potential earthquake sources, permitted to perform an analysis to identify the worst  
440 possible scenario, considering the low frequency/high severity nature of the hazard. Thus, it permitted to estimate the worst  
441 negative consequences as the main outcome of the risk assessment. The potentially most affected areas in Oman, in terms of  
442 tsunami-prone flooded areas, are the northern plain of the country especially Barka and As Seeb as well as Mahawt and Al  
443 Jazir wilayats on the eastern area.

444 The semi quantitative indicator-based approach for the vulnerability and risk assessment, which integrates risk components  
445 (hazard, exposure and vulnerability) and the human and infrastructure dimensions, has been proved useful to discern the more  
446 sensitive areas from a human-centred perspective. The indicators system is helpful for the decision-making process in two  
447 ways. First, the information at the index and indicator level allows a broad insight of where the exposed elements are and  
448 which are more susceptible to suffering the impact of the hazard, i.e., where to focus the efforts towards risk reduction. Second,  
449 the approach permits to easily track back to the variables. This information is essential to understand the precise root causes  
450 of vulnerability and risk results, to be tackled by adequate and specific DRR measures. In Oman, the most vulnerable areas  
451 are located in the northern plain of Oman, highlighting wilayat As Seeb, both in the human and infrastructure dimension and  
452 wilayats Saham and Suwayq in the infrastructure dimension. The eastern part, although affected by the inundation, is not so  
453 vulnerable. The combination of hazard and vulnerability assessments reveals that the worst expected consequences are for As  
454 Seeb and Barka wilayats in terms of human risk and for Sohar and As Seeb in terms of infrastructure risk, according to the  
455 tsunami modelled in this work.

456 As for the connection between risk assessment results and risk management, for each defined tsunami-risk management area,  
457 the methodology allows identifying, selecting and prioritizing a preliminary set of suitable and site-specific RRM. This analysis  
458 discards non-suitable measures and allows a more in-depth exploration, defining the basis for analysing the feasibility of its  
459 implementation, including its technical and economic viability.

460 The involvement and support of relevant stakeholders in charge of the risk management process is essential for the success  
461 and usefulness of the method. Their encouragement has been one of the priorities throughout the application of the method to  
462 achieve the main objective of minimizing the consequences that a potential tsunami could trigger in this area.

463 Through the example shown for the area of Muscat International Airport, it has been illustrated the usefulness of the  
464 methodology, which can be applied in other parts of the world facing other natural events that may trigger a disaster. Local  
465 conditions should be always considered in the definition of the vulnerability indicators, in order to integrate site-specific  
466 conditions.

467 In this sense, with the aim of producing a useful outcome for the risk management, all the results obtained and the detailed  
468 description of the method were compiled in two handy management tools. These tools permit to analyse and facilitate the  
469 decision-making, to replicate and to update the study by the tsunami disaster managers of Oman, thus contributing to the  
470 connection between science-based risk results and disaster risk management.

## 471 5 Acknowledgements

472 The authors thank the Ministry of Transport and Communications of the Government of the Sultanate of Oman (MOTC), the  
473 Public Authority for Civil Aviation (PACA) and the Directorate General of Meteorology (DGMET), for supporting and  
474 funding the project “*Assessment of Coastal Hazards, Vulnerability and Risk for the Coast of Oman*” during the period 2014-  
475 2016. We also thank and appreciate the collaboration of the International Oceanographic Commission of the United Nations  
476 Educational, Scientific and Cultural Organization personnel (IOC-UNESCO).

## 477 6 References

- 478 Abt, S. R., Wittler, R.J., Taylor, A., Love, D. J.: Human stability in a high flood hazard zone. *Water Resour Bull* 25(4):881–  
479 890, 1989.
- 480 Aguirre-Ayerbe, I.: Propuesta metodológica para la evaluación del riesgo de tsunami en zonas costeras. Aplicación en el litoral  
481 de El Salvador. MSc. thesis, Earth Science Department, Universidad de Cantabria, Spain, accessible at:  
482 <http://catalogo.unican.es/cgi-bin/abnetopac/O7576/ID14b6d08d?ACC=161>, 2011.
- 483 Al-Shaqsi, S.: Emergency management in the Arabian Peninsula: A case study from the Sultanate of Oman, in: *Comparative*  
484 *Emergency Management: Understanding Disaster Policies, Organizations, and Initiatives from Around the World*. Edited by  
485 David McEntire, FEMA, USA, 19 pp, 2012.
- 486 Álvarez-Gómez, J. A., Aniel-Quiroga, Í., Gutiérrez-Gutiérrez, O.Q., Larreynaga, J., González, M., Castro, M., Gavidia, F.,  
487 Aguirre Ayerbe, I., González-Riancho, P., and Carreño, E.: Tsunami hazard assessment in El Salvador, Central America, from  
488 seismic sources through flooding numerical models., *Nat. Hazards Earth Syst. Sci.*, 13, 2927–2939, doi:10.5194/nhess- 13-  
489 2927, 2013.
- 490 Álvarez-Gómez, J. A., Martínez Parro, L., Aniel-Quiroga, I., González M., Al-Yahyai S., M. S. Jara, Méndez F., Rueda A.  
491 and Medina R.: Tsunamigenic seismic sources characterization in the Zagros fold and thrust belt. Implications for tsunami  
492 threat in the Persian Gulf, in: *Geophysical Research Abstracts*, 16, p 10951, 2014.
- 493 Aniel-Quiroga, Í., Álvarez-Gómez, J. A., González, M., Aguirre Ayerbe, I., Fernández Pérez, F., M. S. Jara, González-Riancho,  
494 P., Medina, R., Al-Harthy, S., Al-Yahyai, S., Al-Hashmi, S.: Tsunami Hazard assessment and Scenarios Database development  
495 for the Tsunami Warning System for the coast of Oman, *Reducing Tsunami Risk in the Western Indian Ocean conference*,  
496 Muscat, Oman, 2015.
- 497 Berryman, K. (ed.): Review of tsunami hazard and risk in New Zealand. *Geological and Nuclear Sciences (GNS) Client*  
498 *Report 2005/104*, p.149, 2005.
- 499 Birkmann, J., Cardona, O. D., Carreño, M. L., Barbat, A. H., Pelling, M., Schneiderbauer, S., Kienberger, S., Keiler, M.,  
500 Alexander, D., Zeil, P., and Welle, T.: Framing vulnerability, risk and societal responses: the MOVE framework, *Nat. Hazards*,  
501 67, 193–211, 2013.
- 502 Birkmann, J., Teichman, K. v., Welle, T., González, M., and Olabarrieta, M.: The unperceived risk to Europe's coasts: tsunamis  
503 and the vulnerability of Cadiz, Spain, *Nat. Hazards Earth Syst. Sci.*, 10, 2659-2675, available at: [https://doi.org/10.5194/nhess-](https://doi.org/10.5194/nhess-10-2659-2010)  
504 [10-2659-2010](https://doi.org/10.5194/nhess-10-2659-2010), 2010.
- 505 Cardona O.D., Bernal G.A., Ordaz M.G., Salgado-Gálvez M.A., Singh S.K., Mora M.G. and C.P. Villegas.: Update on the  
506 probabilistic modelling of natural risks at global level: Global Risk Model – Global Earthquake and Tropical Cyclone Hazard  
507 Assessment. *Disaster Risk Assessment at Country Level for Earthquakes, Tropical Cyclones (Wind and Storm Surge), Floods,*  
508 *Tsunami and Volcanic Eruptions*. CIMNE & INGENIAR Consortium. Background paper for GAR15. Barcelona-Bogotá D.C.,  
509 Colombia, 2015.
- 510 Michael Beck W. (Editor): *Coasts at Risk: An Assessment of Coastal Risks and the Role of Environmental Solutions*. A joint  
511 publication of United Nations University - Institute for Environment and Human Security (UNU-EHS), The Nature

512 Conservancy (TNC) and the Coastal Resources Center (CRC) at the University of Rhode Island Graduate School of  
513 Oceanography, 2014.

514 Dall’Osso, F., Gonella, M., Gabbianelli, G., Withycombe, G., and Dominey-Howes, D.: Assessing the vulnerability of  
515 buildings to tsunami in Sydney, *Nat. Hazards Earth Syst. Sci.*, 9, 2015–2026, doi:10.5194/nhess-9-2015-2009, 2009a.

516 Dall’Osso, F. and Dominey-Howes, D.: A method for assessing the vulnerability of buildings to catastrophic (tsunami) marine  
517 flooding, 138 pp., available at (last access on September 2017):  
518 [http://www.sydneycoastalcouncils.com.au/Project/Vulnerability\\_of\\_Buildings\\_Tsunami\\_Flooding](http://www.sydneycoastalcouncils.com.au/Project/Vulnerability_of_Buildings_Tsunami_Flooding). 2009b.

519 ESPON Monitoring Committee.: The Spatial Effects and Management of Natural and Technological Hazards in Europe.  
520 European Spatial Observation Network (ESPON 2006) Project 1.3.1., 2006.

521 Garschagen, M., Hagenlocher, M., Comes, M., Dubbert, M., Sabelfeld, R., Lee, Yew J., Grunewald, L., Lanzendörfer, M.,  
522 Mucke, P., Neuschäfer, O., Pott, S., Post, J., Schramm, S., Schumann-Bölsche, D., Vandemeulebroecke, B., Welle, T. and  
523 Birkmann, J.: World Risk Report 2016. World Risk Report. Bündnis Entwicklung Hilft and UNU-EHS, 2016.

524 González Riancho, P., Aguirre Ayerbe, I., García Aguilar, O., Medina, R., González, M., Aniel Quiroga, I., Gutiérrez, O. Q.,  
525 Álvarez Gómez, J. A., Larreynaga, J., and Gavidia, F.: Integrated tsunami vulnerability and risk assessment: application to the  
526 coastal area of El Salvador, *Nat. Hazards Earth Syst. Sci.* 14:1223–1244, doi:10.5194/nhess-14-1223-2014, 2014.

527 Greiving, S., Fleischhauer, M., and Lückenköter, J.: A methodology for an integrated risk assessment of spatially relevant  
528 hazards, *J. Environ. Plann. Man.*, 49, 1–19, doi:10.1080/09640560500372800, 2006.

529 Gutiérrez, O., Aniel-Quiroga I., and González, M.: Tsunami run up in coastal areas: a methodology to calculate run up in large  
530 scale areas. Proc. 34th International Conference on Coastal Engineering, 2014. Ed. J.M. Smith. World Scientific, ASCE, Seoul  
531 (Korea). June, 2014.

532 Harbitz C. B., Nakamura, Y., Arikawa, T., Baykal, C., Dogan, G.G., Frauenfelder, R., Glimsdal, S., Guler, H.G., Issler, D.,  
533 Kaiser, G., Kânoğlu, U., Kisacik, D., Kortenhaus, A., Løvholt, F., Maruyama, Y., Sassa, S., Sharghivand, N., Strusinska-  
534 Correia, A., Tarakcioglu, G.O. and Yalciner, A.Y.: Risk Assessment and Design of Prevention Structures for Enhanced  
535 Tsunami Disaster Resilience (RAPSODI)/ Euro-Japan Collaboration. *Coastal Engineering Journal* 2016 58:04,  
536 doi:10.1142/S057856341640012X, 2016.

537 Heck N.H. List of seismic sea waves. *Bulletin of the Seismological Society of America*, 37 (4), pp. 269-286, 1947

538 Heidarzadeh, M., Pirooz, M.D., Zaker, N.H., Yalciner, A. C., Mokhtari, M., Esmaily, A.: Historical tsunami in the Makran  
539 Subduction Zone off the southern coasts of Iran and Pakistan and results of numerical modeling. *Ocean Engineering*, 35, 774–  
540 786, 2008.

541 Heidarzadeh M, Pirooz MD, Zaker NH. Modelling the near-field effects of the worst-case tsunami in the Makran subduction  
542 zone. *Ocean Eng* 36(5):368–376, 2009

543 Heidarzadeh M, Kijko A. A probabilistic tsunami hazard assessment for the Makran subduction zone at the northwestern  
544 Indian Ocean. *Nat Hazards* 56:577–593, 2011.

545 Heidarzadeh M, Satake K. New insights into the source of the Makran tsunami of 27 November 1945 from tsunami waveforms  
546 and coastal deformation data. *Pure Appl Geophys* 172(3):621–640, 2014a.

547 Heidarzadeh M, Satake K. Possible sources of the tsunami observed in the northwestern Indian Ocean following the 2013  
548 September 24 Mw 7.7 Pakistan inland earthquake. *Geophys J Int* 199(2):752–766, 2014b.

549 Heidarzadeh, M. and Satake, K.: A combined earthquake-landslide source model for the tsunami from the 27 november 1945  
550 Mw8.1 makran earthquake, *Bull. Seismol. Soc. Am.*, 107(2), 1033–1040, doi:10.1785/0120160196, 2017.

551 IH Cantabria-MARN (Instituto de Hidráulica Ambiental IH Cantabria, Ministerio de Medio Ambiente y Recursos Naturales  
552 de El Salvador MARN): Catálogo de Peligrosidad debida a la inundación por Tsunami en la costa de El Salvador, Spanish  
553 Agency for International Development Cooperation (AECID), available at: [http://www.ihcantabria.com/es/proyectos-  
554 id/item/839-tsunami-hazard-el-salvador](http://www.ihcantabria.com/es/proyectos-id/item/839-tsunami-hazard-el-salvador) (last access: September 2017, in Spanish), 2010.

555 IH Cantabria-MARN (Instituto de Hidráulica Ambiental IH Cantabria, Ministerio de Medio Ambiente y Recursos Naturales  
556 de El Salvador MARN): Catálogo de Vulnerabilidad y Riesgo debido a la inundación por Tsunami en la costa de El Salvador,  
557 Spanish Agency for International Development Cooperation (AECID), available at: [http://www.ihcantabria.com/es/proyectos-  
558 id/item/843-tsunami-vulnerability-risk-el-salvador](http://www.ihcantabria.com/es/proyectos-<br/>
558 id/item/843-tsunami-vulnerability-risk-el-salvador) (last access: September 2017, in Spanish), 2012.

559 INFORM. Index for Risk Management. Results 2017. Inter-Agency Standing Committee Reference Group on Risk, Early  
560 Warning and Preparedness and European Commission, 2017.

561 ISO Guide 73:2009.: Risk management — Vocabulary. International Electrotechnical Commission/International Organization  
562 for Standardization. IEC/ISO, available at: <https://www.iso.org/standard/44651.html>, 2009

563 Jelínek, R., Eckert, S., Zeug, G., and Krausmann, E.: Tsunami Vulnerability and Risk Analysis Applied to the City of  
564 Alexandria, Egypt, Tsunami Risk ANd Strategies For the European Region (TRANSFER Project), 2009.

565 Jelínek, R., Krausmann, E., Gonzalez, M., Álvarez-Gómez, J.L., Birkmann, J. and Welle, T.: Approaches for tsunami risk  
566 assessment and application to the city of Cádiz, Spain. *Natural Hazards* 60:273–293, doi: 10.1007/s11069-011-0009-0, 2012.

567 Jenks, G. F.: The data model concept in statistical mapping, *Int. Yearbook Cartogr.*, 7, 186–190, 1967. Jordan, B. R.: Tsunamis  
568 of the Arabian Peninsula. A guide of historic events. *Science of Tsunami Hazards* 27: 31-46, 2008.

569 Jonkman, S. N., Vrijling, J. K., and Vrouwenvelder, A. C. W. M.: Methods for the estimation of loss of life due to floods: a  
570 literature review and a proposal for a new method, *Nat. Hazards*, 46, 353–389, doi:10.1007/s11069-008-9227-5, 2008.

571 Jordan, B. R.: Tsunamis of the Arabian Peninsula. A guide of historic events. *Science of Tsunami Hazards* 27: 31-46, 2008.

572 Karvonen, R.A., Hepojoki, H.K., Huhta, H.K. and A. Louhio.: The use of physical models in dam-break analysis.  
573 RESCDAM Final Report, Helsinki University of Technology, Helsinki, Finland, 2000.

574 Koshimura, S., Katada, T., Mofjeld, H.O., Kawata, Y.: A method for estimating casualties due to the tsunami inundation flow.  
575 *Nat Hazards* 39: 265. <https://doi.org/10.1007/s11069-006-0027-5>, 2006.

576 Latcharote, P., Al-Salem, K., Suppasri, A., Pokavanich, T., Toda, S., Jayaramu, Y., Al-Enezi, A., Al-Ragumand, A. and  
577 Imamura, F. Tsunami hazard evaluation for Kuwait and Arabian Gulf due to Makran Subduction Zone and Subaerial  
578 landslides, *Natural Hazards*, 2017.

579 Linham, M. and Nicholls, R.J.: Technologies for Climate Change Adaptation: Coastal erosion and flooding. TNA Guidebook  
580 Series. UNEP/GEF, 2010.

581 Leone, F., Lavigne, F., Paris, R., Denain, J. C. & Vinet, F.: A spatial analysis of the December 26th, 2004 tsunami-induced  
582 damages: lessons learned for a better risk assessment integrating buildings vulnerability. *Appl. Geogr.* 31, 363–375, 2011.

583 Løvholt, F., Setiadi, N. J., Birkmann, J., Harbitz, C. B., Bach, C., Fernando, N., Kaiser, G., and Nadim, F.: Tsunami risk  
584 reduction—are we better prepared today than in 2004? *International Journal of Disaster Risk Reduction*, 10, 127-142, DOI:  
585 10.1016/j.ijdr.2014.07.008, 2014.

586 Mas, E., Koshimura, S., Suppasri, A., Matsuoka, M., Matsuyama, M., Yoshii, T., Jimenez, C., Yamazaki, F., and Imamura,  
587 F.: Developing Tsunami fragility curves using remote sensing and survey data of the 2010 Chilean Tsunami in Dichato, *Nat.*  
588 *Hazards Earth Syst. Sci.*, 12, 2689-2697, <https://doi.org/10.5194/nhess-12-2689-2012>, 2012.

589 Mokhtari, M.: Tsunami in Makran Region and its effect on the Persian Gulf. In: *Tsunami - A Growing Disaster*. Edited by  
590 Mohammad Mokharti. ISBN 978-953-307-431-3. Published by InTech, 2011.

591 Nicholls, R.J., Cooper, N. and Townend, I.H.: The management of coastal flooding and erosion in Thorne, C.R. et al. (Eds.).  
592 *Future Flood and Coastal Erosion Risks*. London: Thomas Telford, 392-413, 2007.

593 OECD (Organization for Economic Co-operation and Development)/EC-JRC (European Commission Joint Research Centre):  
594 *Handbook on Constructing Composite Indicators, Methodology and Users Guide*, OECD Publications, Paris, 2008.

595 Okada, Y. Surface deformation due to shear and tensile faults in a half-space, *B. Seismol. Soc. Am.*, 75, 1135–1154, 1985.

596 Sato, H., Murakami, H., Kozuki, Y., Yamamoto, N.: Study on a Simplified Method of Tsunami Risk Assessment *Natural*  
597 *Hazards* 29: 325. <https://doi.org/10.1023/A:1024732204299>, 2003.

598 Schmidt-Thomé, P. (Ed.): ESPON Project 1.3.1 – Natural and technological hazards and risks affecting the spatial development  
599 of European regions. Geological Survey of Finland, 2006.

600 **Shoji, G. and Nakamura, T. Damage Assessment of Road Bridges Subjected to the 2011 Tohoku Pacific Earthquake Tsunami.**  
601 **J. Disaster Res., Vol.12, No.1, pp. 79-89, 2017**

602 Strunz, G., Post, J., Zosseder, K., Wegscheider, S., Mück, M., Riedlinger, T., Mehl, H., Dech, S., Birkmann, J., Gebert, N.,  
603 Harjono, H., Anwar, H. Z., Sumaryono, Khomarudin, R. M., and Muhari, A.: Tsunami risk assessment in Indonesia, Nat.  
604 Hazards Earth Syst. Sci., 11, 67–82, doi:10.5194/nhess-11-67-2011, 2011.

605 Sugimoto, T., Murakami, H., Kozuki, Y., Nishikawa, K., Shimada, T.: A Human Damage Prediction Method for Tsunami  
606 Disasters Incorporating Evacuation Activities. Natural Hazards 29:587. <https://doi.org/10.1023/A:1024779724065>, 2003.

607 Suppasri A, Koshimura S, Imamura F.: Developing tsunami fragility curves based on the satellite remote sensing and the  
608 numerical modeling of the 2004 Indian Ocean tsunami in Thailand. Nat. Hazards Earth Syst Sci 2011;11:173–89,  
609 <http://dx.doi.org/10.5194/nhess-11-173-2011>, 2011.

610 Suppasri, A., Mas, E., Charvet, I., Gunasekera, R., Imai, K., Fukutani, Y., Abe, Y. & Imamura, F.: Building damage  
611 characteristics based on surveyed data and fragility curves of the 2011 Great East Japan tsunami. Nat. Hazards 66, 319–341,  
612 2013.

613 Suppasri, A., Leelawat, N., Latcharote, P., Roeber, V., Yamashita K., Hayashi, A., Ohira, H., Fukui, K., Hisamatsu, A.,  
614 Nguyen, D., Imamura, F.: The 2016 Fukushima earthquake and tsunami: Local tsunami behavior and recommendations for  
615 tsunami disaster risk reduction. International Journal of Disaster Risk Reduction, 21 (2017) 323-330, doi:  
616 10.1016/j.ijdr.2016.12.016, <https://doi.org/10.1016/j.ijdr.2016.12.016>, 2017.

617 **Suppasri, A., Fukui, K., Yamashita, K., Leelawat, N., Ohira, H., and Imamura, F. Developing fragility functions for aquaculture**  
618 **rafts and eelgrass in the case of the 2011 Great East Japan tsunami, Nat. Hazards Earth Syst. Sci., 18, 145-155, 2018**

619 Taubenböck, H., Post, J., Roth, A., Zosseder, K., Strunz, G., and Dech, S.: A conceptual vulnerability and risk framework as  
620 outline to identify capabilities of remote sensing, Nat. Hazards Earth Syst. Sci., 8, 409–420, 2008, [http://www.nat-hazards-](http://www.nat-hazards-earth-syst-sci.net/8/409/2008/)  
621 [earth-syst-sci.net/8/409/2008/](http://www.nat-hazards-earth-syst-sci.net/8/409/2008/).

622 Tinti, S., Tonini, R., Bressan, L., Armigliato, A., Gardi, A., Guillande, R., Valencia, N., and Scheer, S.: Handbook of Tsunami  
623 Hazard and Damage Scenarios, SCHEMA project (Scenarios for Hazard induced Emergencies Management), European  
624 Commission’s Joint Research Centre, Institute for the Protection and Security of the Citizen, EU Publications Office,  
625 Luxembourg, 2011.

626 UN (United Nations): Report of the open-ended intergovernmental expert working group on indicators and terminology  
627 relating to disaster risk reduction. United Nations General Assembly A/71/644.1 December 2016. New York, USA, 2016.

628 UNFCCC: Coastal Adaptation Technologies. Bonn: UNFCCC, 1999.

629 UNESCO (United Nations Educational, Scientific and Cultural Organization): Hazard Awareness and Risk Mitigation in  
630 Integrated Coastal Management (ICAM), IOC Manual and Guides No. 50, ICAM Dossier No. 5, UNESCO, Paris, 2009a.

631 UNESCO (United Nations Educational, Scientific and Cultural Organization): Tsunami risk assessment and mitigation for the  
632 Indian Ocean, Knowing your tsunami risk – and what to do about it, IOC Manuals and Guides No. 52, UNESCO, Paris, 2009b.

633 UNISDR (United Nations International Strategy for Disaster Reduction): Living with Risk: a Global Review of Disaster  
634 Reduction Initiatives, 2004 version, UN Publications, Geneva, 2004.

635 UNISDR (United Nations International Strategy for Disaster Reduction): Terminology on Disaster Risk Reduction. Published  
636 by the UN/ISDR. Geneva, Switzerland, May 2009.

637 UNISDR/CRED: Tsunami Disaster Risk: Past impacts and projections. United Nations Office for Disaster Risk Reduction  
638 (UNISDR), Centre for Research on the Epidemiology of Disasters (CRED), available at: [http://www.preventionweb.net/](http://www.preventionweb.net/files/50825_credtsunami08.pdf)  
639 [files/50825\\_credtsunami08.pdf](http://www.preventionweb.net/files/50825_credtsunami08.pdf), 2016.

640 UNISDR (United Nations International Strategy for Disaster Reduction): Global Assessment Report on Disaster Risk  
641 Redcution. GAR Atlas, available at: <https://www.unisdr.org/we/inform/publications/53086>, 2017.

642 Valencia, N., Gardi, A., Gauraz, A., Leone, F., and Guillande, R.: New tsunami damage functions developed in the framework  
643 of SCHEMA project: application to European-Mediterranean coasts, *Nat. Hazards Earth Syst. Sci.*, 11, 2835-2846,  
644 <https://doi.org/10.5194/nhess-11-2835-2011>, 2011.

645 Wegscheider, S., Post, J., Zosseder, K., Mück, M., Strunz, G., Riedlinger, T., Muhari, A., and Anwar, H. Z.: Generating  
646 tsunami risk knowledge at community level as a base for planning and implementation of risk reduction strategies, *Nat.*  
647 *Hazards Earth Syst. Sci.*, 11, 249–258, doi:105194/nhess-11-249-2011, 2011

648 Wijetunge, L. J.: A deterministic analysis of tsunami hazard and risk for the southwest coast of Sri Lanka, *Cont. Shelf Res.*,  
649 79, 23–35, 2014.

650 Wang X.: COMCOT User Manual Ver. 1.7, 59 pp. Cornell University, 2009

651 Xia, J., Falconer, R.A, Wang, Y. and Xiao, X.: New criterion for the stability of a human body in floodwaters.  
652 *Journal of Hydraulic Research*, 52(1), pp.93–104, 2014.
