# Supplementary material for: From Tsunami Risk Assessment to Disaster Risk Reduction. The case of Oman
Source: Copernicus journal article supplement (doi:10.5194/nhess-2017-448), 2018-01-09
Supplement: Supplementary file [file nhess-2017-448-EC1-supplement.pdf]

Editorial note to  
Nat. Hazards Earth Syst. Sci. Discuss., nhess-2017-448, 2018  
<https://doi.org/10.5194/nhess-2017-448-editorial-note>  
© Author(s) 2018. This work is distributed under  
the Creative Commons Attribution 4.0 License.

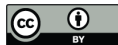

## *Editorial note to*

# **“From tsunami risk assessment to disaster risk reduction – the case of Oman”, Nat. Hazards Earth Syst. Sci. Discuss., nhess-2017-448, 2018**

**Uwe Ulbrich**<sup>1,\*</sup>

<sup>1</sup>Institute for Meteorology, Freie Universität Berlin, 12165 Berlin, Germany

\*Executive editor

**Correspondence:** Uwe Ulbrich ([ulbrich@met.fu-berlin.de](mailto:ulbrich@met.fu-berlin.de))

Published: 20 August 2018

Please note that one figure was exchanged in the discussion paper following a formal request, without any changes to the content. There is no change in the figure caption, nor in the content of the article, just in the image of one figure.
